# Supplementary material for: A novel target for cancer therapy on the RNA stimulation by FUBP1- interacting repressor (FIR) via TFIIH/P62
Source: Research Square preprint supplement (doi:10.21203/rs.3.rs-1722555/v1), 2022-06-06
Supplement: Supplementary file 3 [file bbad7b4e584dd3a2b9d9d82e.xlsx]

## Sheet: Table S1
Table S4. List of antibodies, siRNA and primers used in this study.
Primary antibodies		company	catalog#
TFIIH p62 (H-10)		Santa Cruz Biotecnology Inc.	sc-25329
c-Myc (9E10)		Santa Cruz Biotecnology Inc.	sc-40
ACTIN (C-11)		Santa Cruz Biotecnology Inc.	sc-1615
FLAG M2		Sigma Aldrich	F1804
FIR (6B4)		see Materials and Methods
Secondary antibody		company
α-rabbit/HRP		ECL
α-mouse/HRP		DAKO
α-goat/HRP		Molecular Probes, Invitrogen
Target	siRNA	Sequences
FIR protein	FIR-1	5’-rCrArGUrGrAUrGrGUUrCUrGrCrGrCrArATT(sence)
		5’-UUrGrCrGrCrArGrArArCrCrAUrCrArCUrGTT(anti-sence)
	FIR-2	5’-rGrArCrArCrAUrGrGUrGrAUrGrCrArGrArATT(sence)
		5’-UUrCUrGrCrAUrCrArCrCrAUrGUrGUrCTT(anti-sence)
	FIRΔexon2	5’-rGrArCrCrAUrArGrCUrCUrCrGrGrCrArCrATT(sence)
		5’-UrGUrGrCrCrGrArGrArGrCUrAUrGrGUrCTT(anti-sence)
Targets	primers	Sequences
HPRT qPCR	HPRT-Forward	5'-GCGTCGTGATTAGCGATGA-3'
	HPRT-Reverse	5'-ATGGCCTCCCATCTCCTT-3'
FIR qPCR	FIR-Forward (exon2)	5'-CCATAGCTCTCCAGGTCA-3'
FIRΔexon2 qPCR	FIRΔexon2-Forward (exon1-3)	5'-CGACCATAGCTCTCGGCA-3'
	FIR and FIRΔexon2-Reverse (exon6)	5'-CGTAGACGCGGCACATGA-3'
	FIR-Probe at exon4-6	5'-GCAGCTCACCAACCTGCAGATGGC-3' with fluorescein
	FIR-Probe at exon6	5'-GCTCAGCGGCAGCGGGCGCT-3' with LCRed
RPL6 qPCR	RPL6-Forward	5'-GGTACCCGGGTGGTTAAACT-3'
	RPL6-Reverse	5'-TCTCACGTGCTGACTGAAGG-3'
RPL19 qPCR	RPL19-Forward	5'-AAACAAGCGGATTCTCATGG-3'
	RPL19-Reverse	5'-GCGTGCTTCCTTGGTCTTAG-3'
RPL23A qPCR	RPL23A-Forward	5'-GACCACTGAGTCTGCCATGA-3'
	RPL23A-Reverse	5'-CGAATCAGGGTGTTGACCTT-3'
RPL29 qPCR	RPL29-Forward	5'-GCACAACAAAAAGGGCCTAA-3'
	RPL29-Reverse	5'-GCTTAACCTCCTTGGGCTTT-3'
RPL30 qPCR	RPL30-Forward	5'-AAGACGAAAAAGTCGCTGGA-3'
	RPL30-Reverse	5'-AATGACCAATTTCGCTTTGC-3'
RPL37A qPCR	RPL37A-Forward	5'-TGTGGCAAAACCAAGATGAA-3'
	RPL37A-Reverse	5'-TTCTGATGGCGGACTTTACC-3'
RPL37 qPCR	RPL37-Forward	5'-AACGTCATCGTTTGGAAAGC-3'
	RPL37-Reverse	5'-TTAGCCTTGGCACTCCAGTT-3'
RPL38 qPCR	RPL38-Forward	5'-CGAAAGGATGCCAAATCTGT-3'
	RPL38-Reverse	5'-GCAGGGACTGCTTCAGTTTC-3'
RPS6 qPCR	RPS6-Forward	5'-TGCTCTGAAGAAGCAGCGTA-3'
	RPS6-Reverse	5'-GGAAAGTCTGCGTCTCTTCG-3'
RPS10 qPCR	RPS10-Forward	5'-CCGGATTGCCATTTATGAAC-3'
	RPS10-Reverse	5'-CCTCGGGACTTGAGAGACTG-3'
RPS14 qPCR	RPS14-Forward	5'-TTTCTGGCAAGGAAACCATC-3'
	RPS14-Reverse	5'-TGATGTGTAGGGCGGTGATA-3'
RPS15A qPCR	RPS15A-Forward	5'-GTGCTTATTAGGCCGTGCTC-3'
	RPS15A-Reverse	5'-TTTAGCCTGCCTGTGAGGTT-3'
RPS21 qPCR	RPS21-Forward	5'-GAAATGCTCCGCTAGCAATC-3'
	RPS21-Reverse	5'-CCCCGCAGATAGCATAAGTT-3'
RPS29 qPCR	RPS29-Forward	5'-GGGTCACCAGCAGCTGTACT-3'
	RPS29-Reverse	5'-AAACACTGGCGGCACATATT-3'
MT1E qPCR	MT1E-Forward	5'-GGCAGGACAGCATTTTTCTC-3'
	MT1E-Reverse	5'-AGAACCCAGACCCAGAGGAT-3'
SLC3A2 qPCR	SLC3A2-Forward	5'-CCAGGTTCGGGACATAGAGA-3'
	SLC3A2-Reverse	5'-GAGTTAGTCCCCGCAATCAA-3'
TUBA1C qPCR	TUBA1C-Forward	5'-TGCCTGTTATACCGTGGTGA-3'
	TUBA1C-Reverse	5'-CACAGTGGGAGGCTGGTAAT-3'
TUBB qPCR	TUBB-Forward	5'-CTCTCCGTCCATCAGTTGGT-3'
	TUBB-Reverse	5'-TGGTGTGGTCAGCTTCAGAG-3'
FSTL1 qPCR	FSTL1-Forward	5'-CCTGTGTGTGGCAGTAATGG-3'
	FSTL1-Reverse	5'-TCTCTTTGCAGTGTCCATCG-3'
INSIG1 qPCR	INSIG1-Forward	5'-TACGCTGATCACGCAGTTTC-3'
	INSIG1-Reverse	5'-TGACGCCTCCTGAGAAAAAT-3'
FTH1 qPCR	FTH1-Forward	5'-CTGGAGCTCTACGCCTCCTA-3'
	FTH1-Reverse	5'-TGGTTCTGCAGCTTCATCAG-3'
